# Supplementary material
Source: Springer Nature journal article supplement (https://www.springermedizin.de/resource/supplementary/12958_2013_1096_MOESM5_ESM.pdf/9566806)

# Embryo Morphology and Pregnancy Outcome

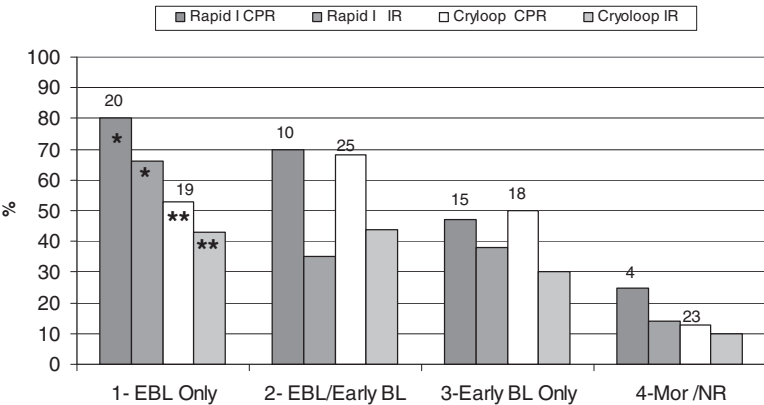

Supplement: MOESM5 [file 9566806]
